# Supplementary material
Source: PubMed Central journal article supplement (PMC3135837)
Supplement: supp_44_6_749__1.pdf [file supp_44_6_749__1.pdf]

## Mucin Production During Pre- and Post-Natal Mouse Lung Development

Michelle G. Roy<sup>1</sup>, Mahdis Rahmani<sup>1</sup>, Jesus R. Hernandez<sup>2</sup>, Samantha N. Alexander<sup>1</sup>, Camille Ehre<sup>3</sup>, Samuel B. Ho<sup>4</sup>, Christopher M. Evans<sup>1,2</sup>

<sup>1</sup>Department of Pulmonary Medicine, The University of Texas M.D. Anderson Cancer Center, Houston, Texas. <sup>2</sup>Tecnológico de Monterrey Escuela de Medicina, Monterrey, Nuevo León, México. <sup>3</sup>Cystic Fibrosis/Pulmonary Research and Treatment Center, University of North Carolina at Chapel Hill, Chapel Hill, North Carolina. <sup>4</sup>Department of Medicine, Veterans Affairs San Diego Healthcare System and University of California, San Diego, California

# ONLINE DATA SUPPLEMENT

*Corresponding Author:*

Christopher M. Evans, PhD  
Department of Pulmonary Medicine  
The University of Texas M.D. Anderson Cancer Center  
2121 West Holcombe Boulevard  
Room 704  
Houston, Texas 77030  
(713) 563-7431  
(713) 563-0411 [FAX]  
[cevens@mdanderson.org](mailto:cevens@mdanderson.org)

**Running title:** Muc5ac and Muc5b in developing mouse lungs

**Key words:** mouse, lung, mucin, Muc5ac, Muc5b

**Grant information:** Grant sponsor: The National Institutes of Health; Grant number: HL080396; Grant sponsor: American Lung Association; Grant number: RG-22720.

**Table E1.** Primers used in the current studies.

| <b>Transcript</b> | <b>Sequence</b> |                                              | <b>Genbank Source</b> |
|-------------------|-----------------|----------------------------------------------|-----------------------|
| Muc1              | Sense           | 5'-GGT TGC TTT GGC TAT CGT CTA TTT           | NM_013605             |
|                   | Anti            | 5'-AAA GAT GTC CAG CTG CCC ATA               |                       |
|                   | Probe           | 5'-TGT GCC AGT GCC GCC GAA AGA               |                       |
| Muc2              | Sense           | 5'-TGA TGA GAT CTG CAA GTC TTG TAC AT        | XM_620587             |
|                   | Anti            | 5'-TGT TAA GAA TCT TCC CTT CAT CTG G         |                       |
|                   | Probe           | 5'-CAC CAA CAC GTC AAA AAT CGA ATG CCA       |                       |
| Muc4              | Sense           | 5'-TGC CAG GAC TGT GGA TTT TAA CT            | NM_080457             |
|                   | Anti            | 5'-CTG ACC ATC TGT AAC GTA GAA GGA           |                       |
|                   | Probe           | 5'-AAG ATC CTG ATT GGC TTT CCC CTC GG        |                       |
| Muc5ac            | Sense           | 5'-AGA ATA TCT TTC AGG ACC CCT GCT           | AJ511870              |
|                   | Anti            | 5'-ACA CCA GTG CTG AGC ATA CTT TT            |                       |
|                   | Probe           | 5'-CTC AGC GTG GAG AAT G                     |                       |
| Muc5b             | Sense           | 5'-CAT CCA TCC CAT TTC TAC CAC AA            | NM_028801             |
|                   | Anti            | 5'-AGG CAA CAT AGA GTT GCT TTT GG            |                       |
|                   | Probe           | 5'-ACA ACC AAG AAC CCT CAA ACA CTA GTC AC AG |                       |
| Muc16             | Sense           | 5'-CGT GCC TGA TGT GCT GTT TC                | XM_911929             |
|                   | Anti            | 5'-GCA TGA CGT TGA ACT TGG TAG TCT           |                       |
|                   | Probe           | 5'-TGG TGA CTG TCT GCA GGA GAA AAA AGG AG    |                       |
| Muc19             | Sense           | 5'-GCA ACC CCA CAG GCT TAG TG                | NM_207243             |
|                   | Anti            | 5'-TTT GAA TCG TAG ATT CTC TCT TCT TCT G     |                       |
|                   | Probe           | 5'-TCA GGA CTG CCC AAA GCA AAC ATG G         |                       |
| CCSP              | Sense           | 5'-CCT TTC AAC CCT GGC TCA GA                | X67702                |
|                   | Anti            | 5'-AGG GTA TCC ACC AGT CTC TTC AG            |                       |
|                   | Probe           | 5'-CAA AAT GCG GGC ACC CAG                   |                       |
| γ-Actin           | Sense           | 5'-AAT CGC CGC ACT CGT CA                    | NM_009609             |
|                   | Anti            | 5'-CGC CAG CAA AGC CGG                       |                       |
|                   | Probe           | 5'- CAA TGG CTC CGG CAT GTG CAA A            |                       |

Table E2. AB-PAS positive cells in the conducting airways.

| Time  | n | Cartilagenous bronchi |    | Axial bronchi  |    | Bronchioles    |    |
|-------|---|-----------------------|----|----------------|----|----------------|----|
|       |   | cells/mm ± SEM        | *% | cells/mm ± SEM | *% | cells/mm ± SEM | *% |
| E12.5 | 6 | 0.0±0.0               |    | 0.0±0.0        | 0  | †N/D           |    |
| E14.5 | 5 | 0.0±0.0               |    | 0.0±0.0        | 0  | †N/D           |    |
| E15.5 | 5 | 97.8±16.7             | 46 | 57.2±8.6       | 25 | 0.0±0.0        | 0  |
| E16.5 | 5 | 35.0±10.8             | 17 | 36.1±4.1       | 13 | 0.0±0.0        | 0  |
| E17.5 | 4 | †  95.1±10.2          | 35 | 121.8±47.1     | 32 | 1.8±1.8        | 1  |
| E18.5 | 5 | 75.1±9.5              | 40 | §  35.3±5.5    | 21 | †5.2±1.5       | 4  |
| PN5   | 8 | 58.6±6.9              | 30 | §17.2±10.4     | 9  | 0.0±0.0        | 0  |
| PN14  | 6 | 74.4±11.7             | 41 | †  88.3±8.4    | 44 | 0.5±0.5        | <1 |
| PN28  | 5 | 43.8±12.3             | 26 | 35.9±10.1      | 15 | 0.4±0.4        | <1 |

\* Percentages are calculated against total numbers of cells above the basement membrane in each image used.

† 'N/D' - Not determined due to high levels of intracellular glycogen staining (1).

‡ identifies statistically significant differences ( $p < 0.05$ ) between AB-PAS positive cell numbers at the indicated timepoints vs. AB-PAS positive cell numbers at PN28 by ANOVA.

§ identifies statistically significant differences between AB-PAS positive cell numbers in axial vs. cartilagenous bronchi at the same timepoint by ANOVA ( $p < 0.05$ ).

|| identifies statistically significant differences between AB-PAS positive cell number in cartilagenous and axial bronchi vs. bronchioles at the same timepoint by ANOVA ( $p < 0.05$ ).

Table E3. Mean values of individual data points in Figure 2 (fmol per 100 ng input RNA  $\pm$  SEM and transcript per  $\gamma$ -actin (mol/mol)).

| Time  | <i>n</i> | Muc2              |                     | Muc5ac            |                     | Muc5b          |                     |
|-------|----------|-------------------|---------------------|-------------------|---------------------|----------------|---------------------|
|       |          | fmol $\pm$ SEM    | per $\gamma$ -actin | fmol $\pm$ SEM    | per $\gamma$ -actin | fmol $\pm$ SEM | per $\gamma$ -actin |
| E14.5 | 4        | 0.185 $\pm$ 0.104 | 0.026               | 0.142 $\pm$ 0.042 | 0.019               | 362 $\pm$ 75.4 | *37.6               |
| E17.5 | 8        | 0.032 $\pm$ 0.017 | 0.007               | 0.156 $\pm$ 0.042 | †0.030              | 293 $\pm$ 27.0 | *62.4               |
| E18.5 | 4        | 0.011 $\pm$ 0.006 | 0.002               | 0.086 $\pm$ 0.016 | †0.014              | 357 $\pm$ 59.3 | *54.3               |
| PN5   | 3        | 0.047 $\pm$ 0.025 | 0.012               | 0.111 $\pm$ 0.042 | 0.031               | 369 $\pm$ 16.3 | *‡101.5             |
| PN14  | 6        | 0.035 $\pm$ 0.016 | 0.005               | 1.088 $\pm$ 0.876 | 0.146               | 348 $\pm$ 48.5 | *43.8               |
| PN28  | 6        | 0.007 $\pm$ 0.004 | 0.001               | 0.356 $\pm$ 0.139 | 0.062               | 461 $\pm$ 36.9 | *‡84.2              |

  

| Time  | <i>n</i> | Muc1            |                     | Muc4            |                     | Muc16             |                     |
|-------|----------|-----------------|---------------------|-----------------|---------------------|-------------------|---------------------|
|       |          | fmol $\pm$ SEM  | per $\gamma$ -actin | fmol $\pm$ SEM  | per $\gamma$ -actin | fmol $\pm$ SEM    | per $\gamma$ -actin |
| E14.5 | 4        | 4.8 $\pm$ 2.77  | 0.42                | 1.0 $\pm$ 0.190 | 0.08                | 0.013 $\pm$ 0.003 | 0.002               |
| E17.5 | 8        | 6.2 $\pm$ 2.32  | 0.94                | 1.7 $\pm$ 0.496 | 0.33                | 0.020 $\pm$ 0.008 | 0.004               |
| E18.5 | 4        | 8.1 $\pm$ 4.64  | 0.93                | 1.5 $\pm$ 0.234 | 0.29                | 0.005 $\pm$ 0.001 | 0.001               |
| PN5   | 3        | 6.8 $\pm$ 2.85  | 1.80                | 3.5 $\pm$ 2.038 | 0.97                | 0.025 $\pm$ 0.014 | 0.007               |
| PN14  | 6        | 16.6 $\pm$ 4.49 | 1.96                | 2.2 $\pm$ 0.595 | 0.27                | 0.023 $\pm$ 0.008 | 0.003               |
| PN28  | 6        | 10.6 $\pm$ 3.90 | 1.74                | 1.5 $\pm$ 0.216 | 0.27                | 0.020 $\pm$ 0.006 | 0.003               |

  

| Time  | <i>n</i> | CCSP            |                     | $\gamma$ -actin |                     |
|-------|----------|-----------------|---------------------|-----------------|---------------------|
|       |          | fmol $\pm$ SEM  | per $\gamma$ -actin | fmol $\pm$ SEM  | per $\gamma$ -actin |
| E14.5 | 4        | 1.8 $\pm$ 1.4   | 0.14                | 9.88 $\pm$ 2.74 |                     |
| E17.5 | 8        | 6.1 $\pm$ 3.2   | 0.73                | 6.07 $\pm$ 1.71 |                     |
| E18.5 | 4        | 11.8 $\pm$ 7.2  | 1.6                 | 7.44 $\pm$ 2.33 |                     |
| PN5   | 3        | 5354 $\pm$ 4978 | 1537                | 3.92 $\pm$ 0.86 |                     |
| PN14  | 6        | 7870 $\pm$ 5000 | 931                 | 8.47 $\pm$ 1.44 |                     |
| PN28  | 6        | 9231 $\pm$ 6212 | 1252                | 5.90 $\pm$ 0.76 |                     |

\* identifies significance between Muc5b mRNA levels and those of Muc5ac and Muc2.

† identifies significance between Muc5ac and Muc2.

‡ identifies significance between E14.5 and later values.

Differences in Muc5ac and Muc2 levels are not significant over time.

Table E4. Muc5b protein production in developing airways.

| Time  | n | Cartilaginous bronchi    | Axial bronchi            | Bronchioles              |
|-------|---|--------------------------|--------------------------|--------------------------|
|       |   | nl/mm <sup>2</sup> ± SEM | nl/mm <sup>2</sup> ± SEM | nl/mm <sup>2</sup> ± SEM |
| E12.5 | 1 | 0.0                      | 0.0                      | 0.0                      |
| E14.5 | 1 | 0.9                      | 0.0                      | 0.0                      |
| E15.5 | 3 | <sup>†,§</sup> 1.0±0.1   | 1.2±0.8                  | 0.0±0.0                  |
| E16.5 | 3 | 1.1±0.9                  | *0.4±0.3                 | 0.0±0.0                  |
| E17.5 | 2 | <sup>†,§</sup> 1.2±0.2   | 0.7±0.5                  | 0.0±0.0                  |
| E18.5 | 3 | <sup>†,‡</sup> 3.9±1.1   | *0.5±0.3                 | 0.0±0.0                  |
| PN5   | 3 | 1.0±0.1                  | *0.4±0.1                 | 0.0±0.0                  |
| PN14  | 3 | <sup>§</sup> 2.5±0.7     | <sup>§</sup> 1.4±0.4     | 0.0±0.0                  |
| PN28  | 3 | <sup>†,§</sup> 1.5±0.5   | <sup>†,§</sup> 1.7±0.2   | 0.0±0.0                  |

\* identifies statistically significant differences (p<0.05) between Muc5b volume density at the indicated timepoints vs. Muc5b volume density at PN28 by ANOVA.

† identifies statistically significant differences (p<0.05) between Muc5b and Muc5ac volume densities at the same timepoints and airway levels by ANOVA. See Table E3 for Muc5ac values.

‡ identifies statistically significant differences (p<0.05) between Muc5b volume densities in cartilaginous vs. axial bronchi at the same timepoint by ANOVA.

§ identifies statistically significant differences between (p<0.05) Muc5b volume densities in cartilaginous and axial bronchi vs. bronchioles at the same timepoint by ANOVA.

Table E5. Muc5ac protein production in developing airways.

| Time  | <i>n</i> | Cart. bronchi            | Axial bronchi            | Bronchioles              |
|-------|----------|--------------------------|--------------------------|--------------------------|
|       |          | nl/mm <sup>2</sup> ± SEM | nl/mm <sup>2</sup> ± SEM | nl/mm <sup>2</sup> ± SEM |
| E12.5 | 1        | *N/D                     | 0.0                      | 0.0                      |
| E14.5 | 1        | 0.0                      | 0.0                      | 0.0                      |
| E15.5 | 3        | 0.0±0.0                  | 0.0±0.0                  | 0.0±0.0                  |
| E16.5 | 2        | 0.0±0.0                  | 0.0±0.0                  | 0.0±0.0                  |
| E17.5 | 2        | 0.0±0.0                  | 0.0±0.0                  | 0.0±0.0                  |
| E18.5 | 2        | 0.0±0.0                  | 0.0±0.0                  | 0.0±0.0                  |
| PN5   | 2        | 0.0±0.0                  | 0.0±0.0                  | 0.0±0.0                  |
| PN14  | 3        | †0.6±0.3                 | †0.5±0.1                 | 0.0±0.0                  |
| PN28  | 3        | 0.0±0.0                  | 0.0±0.0                  | 0.0±0.0                  |

\* 'N/D' - not determined due to sampling.

† identifies statistically significance differences of changes in Muc5ac volume density over the time course of the study by ANOVA ( $p < 0.05$ ).

*Figure E1.* Quantitative RT-PCR analysis of membrane associated mucin expression in the developing mouse lung. Gene specific probes demonstrate Muc1 (filled circles), Muc4 (open circles), and Muc16 (filled inverted triangles) mucin levels compared to  $\gamma$ -actin. Data are means  $\pm$  standard errors (n = 3-8 animals/timepoint). Data were analyzed by ANOVA; a p-value < 0.05 was considered a significant difference. '‡' identifies significance between Muc1 mRNA levels and those of Muc4 and Muc16. '†' identifies significance between Muc4 and Muc16. '‡' identifies significance between E14.5 and later values for individual mucins. Differences in Muc16 levels were not significant over time.

## Reference List

1. Ten Have-Oproek AA, Dubbeldam JA, Otto-Verberne CJ. Ultrastructural Features of Type II Alveolar Epithelial Cells in Early Embryonic Mouse Lung. *Anat Rec* 1988;221:846-853.
