# Supplementary material
Source: PubMed Central journal article supplement (PMC3135837)

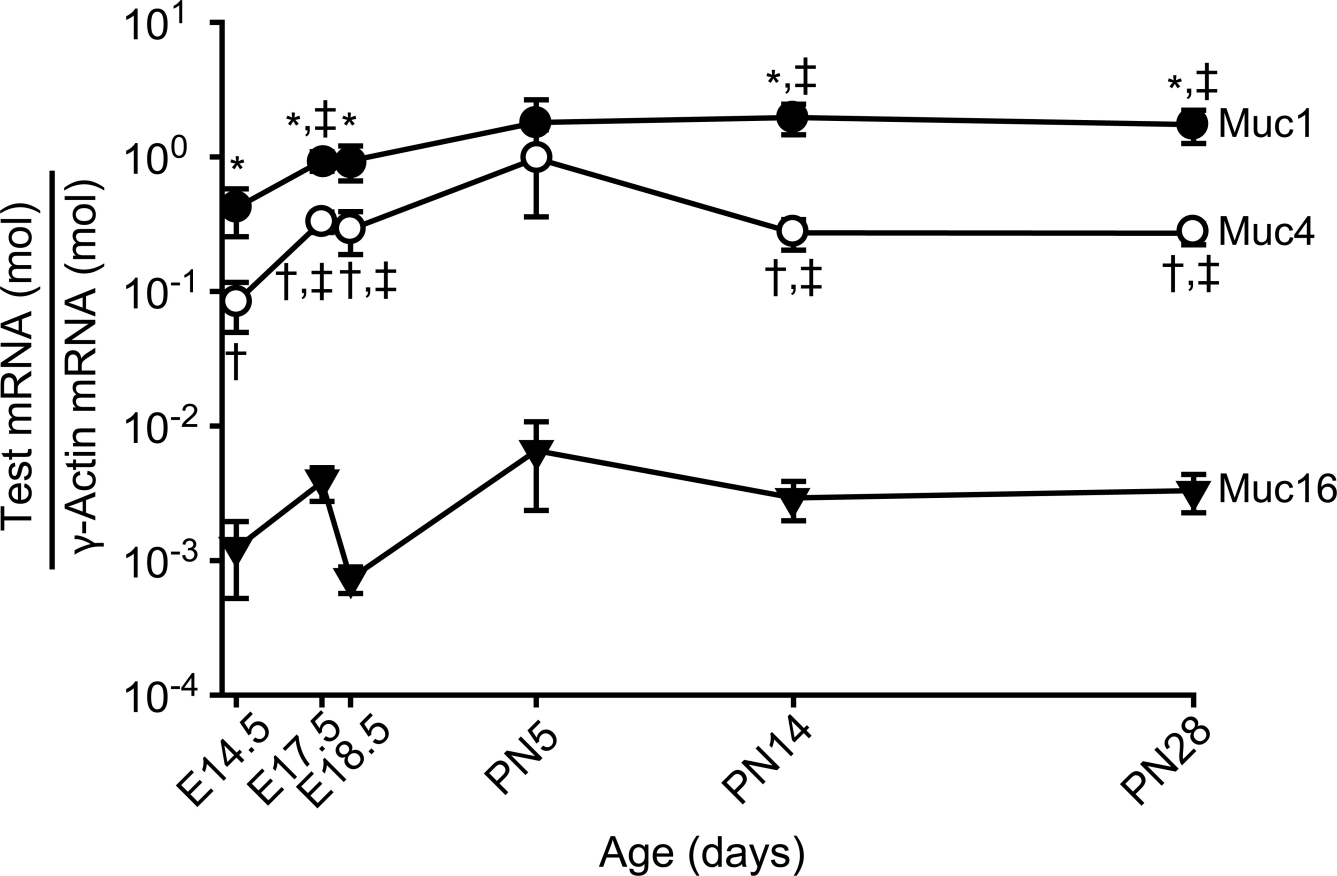

Supplement: supp_44_6_749__2.pdf [file supp_44_6_749__2.pdf]
